# Supplementary material for: Low serum magnesium levels are associated with impaired peripheral nerve function in type 2 diabetic patients
Source: PubMed Central journal article supplement (PMC5013481; doi:10.1038/srep32623), 2016-09-07
Supplement: srep32623-s1.pdf [file srep32623-s1.pdf]

# **Low serum magnesium levels are associated with impaired peripheral nerve function in type 2 diabetic patients**

**Chen Chu<sup>1,+</sup>, Weijing Zhao<sup>2,+</sup>, Yinan Zhang<sup>3,+</sup>, Lu Li<sup>1</sup>, Jingyi Lu<sup>1</sup>, Lan Jiang<sup>4</sup>,  
Congrong Wang<sup>1,\*</sup> & Weiping Jia<sup>1,\*</sup>**

<sup>1</sup>Shanghai Jiao Tong University Affiliated Sixth People's Hospital, Department of Endocrinology and Metabolism, Shanghai Diabetes Institute, Shanghai Key Laboratory of Diabetes Mellitus, Shanghai Clinical Center for Diabetes, 600 Yishan Road, Shanghai 200233, People's Republic of China

<sup>2</sup>Shanghai Jiao Tong University Affiliated Sixth People's Hospital, Department of Endocrinology and Metabolism, Shanghai Diabetes Institute, 600 Yishan Road, Shanghai 200233, People's Republic of China

<sup>3</sup>Shanghai Jiao Tong University Affiliated Sixth People's Hospital, Center for Translational Medicine, Shanghai Key Laboratory of Diabetes Mellitus, The Metabolic Diseases Biobank, Shanghai, 200233, People's Republic of China

<sup>4</sup>Shanghai Jiao Tong University Affiliated Sixth People's Hospital, Department of Electrophysiology, Shanghai, 200233, People's Republic of China

\* Correspondence and requests for materials should be addressed to C.W. (email: crwang@sjtu.edu.cn) or W.J. (email: wpjia@sjtu.edu.cn).

<sup>+</sup> These authors contributed equally to this work.

## Supplementary information

### Supplementary tables

Supplementary Table S1. Characteristics of nerve conduction parameters of peroneal nerve, according to tertiles of serum magnesium.

| Variable                      | Serum magnesium          |                             |                           | <i>P</i> value |
|-------------------------------|--------------------------|-----------------------------|---------------------------|----------------|
|                               | Low tertile<br>(N = 358) | Medium tertile<br>(N = 336) | High tertile<br>(N = 269) |                |
| Serum magnesium (mmol/L)      | ≤0.85                    | 0.85-0.92                   | > 0.92                    |                |
| Motor peroneal CV (m/s)       | 43.25 (41.08, 46.50)     | 43.50 (41.00, 46.20)        | 44.20 (41.50, 47.10)      | 0.053          |
| Motor peroneal amplitude (mv) | 3.90 (2.50, 5.60)        | 4.20 (2.30, 5.60)           | 4.00 (2.70, 6.15)         | 0.307          |
| Motor peroneal latency (ms)   | 3.30 (3.00, 3.80)        | 3.20 (2.90, 3.70)           | 3.20 (2.90, 3.80)         | 0.075          |

The data were shown as median (25th-75th percentiles).

CV, conduction velocity.

Supplementary Table S2. Characteristics of F-wave parameters, according to groups of nerve function.

| Variable                      | Total<br>(N = 895)    | Normal NC<br>(N = 676) | Abnormal NC<br>(N = 219) | <i>P</i> value |
|-------------------------------|-----------------------|------------------------|--------------------------|----------------|
| Minimum F-wave latencies (ms) |                       |                        |                          |                |
| Motor peroneal                | 48.50 (45.20, 53.80)  | 48.10 (44.83, 52.70)   | 50.10 (46.00, 56.50)     | 0.001          |
| Motor tibial                  | 48.30(45.20, 51.20)   | 47.70 (44.80,50.58)    | 50.10 (46.80, 54.10)     | <0.001         |
| Motor median                  | 25.60 (24.10, 27.30 ) | 25.40 (23.90, 27.10)   | 26.30 (24.80, 28.30)     | <0.001         |
| Motor ulnar                   | 25.90 (24.40, 27.50)  | 25.80 (24.30, 27.30)   | 26.40 (24.90, 28.70)     | <0.001         |
| F-wave persistence (%)        |                       |                        |                          |                |
| Motor peroneal                | 58.80 ±35.95          | 60.09 ±35.47           | 54.82 ±37.23             | 0.060          |
| Motor tibial                  | 95.30 ±16.01          | 96.02 ±13.78           | 93.04 ±21.46             | 0.057          |
| Motor median                  | 89.62 ±18.51          | 90.12 ±18.32           | 88.05 ±19.06             | 0.153          |
| Motor ulnar                   | 95.89 ±11.50          | 96.24 ±10.80           | 94.81 ±13.45             | 0.159          |

Data were expressed as mean ± standard deviation (SD) for normal distribution variables or as median (25th-75th percentiles) for skewed distribution variables. NC, nerve conduction.

Supplementary Table S3. Characteristics of F-wave parameters, according to tertiles of serum magnesium.

| Variable                      | Serum magnesium        |                           |                         | P value |
|-------------------------------|------------------------|---------------------------|-------------------------|---------|
|                               | Low tertile<br>(N=337) | Medium tertile<br>(N=307) | High tertile<br>(N=251) |         |
| Minimum F-wave latencies (ms) |                        |                           |                         |         |
| Motor peroneal                | 49.30 (45.40, 54.80)   | 48.80 (45.30, 53.40)      | 47.50 (43.60, 52.30)    | 0.015   |
| Motor tibial                  | 48.60 (45.30, 51.40)   | 48.90 (46.00, 51.50)      | 47.20 (44.40, 50.70)    | 0.003   |
| Motor median                  | 25.80 (24.20, 27.75)   | 25.60 (24.20, 27.30)      | 25.40 (24.00, 27.10)    | 0.241   |
| Motor ulnar                   | 26.20 (24.40, 28.00)   | 26.00 (24.40, 27.40)      | 25.50 (24.10, 27.30)    | 0.054   |
| F-wave persistence (%)        |                        |                           |                         |         |
| Motor peroneal                | 57.66 ±37.07           | 60.20 ±35.65              | 58.64 ±34.86            | 0.668   |
| Motor tibial                  | 95.67 ±15.11           | 94.59 ±17.82              | 95.68 ±14.83            | 0.631   |
| Motor median                  | 90.24 ±17.81           | 88.86 ±18.74              | 89.72 ±19.19            | 0.637   |
| Motor ulnar                   | 95.83 ±12.06           | 94.93 ±12.37              | 97.16 ±9.37             | 0.075   |

Data were expressed as mean ± standard deviation (SD) for normal distribution variables or as median (25th-75th percentiles) for skewed distribution variables.
